# Supplementary material for: S100A4 contributes to colorectal carcinoma aggressive behavior and to chemoradiotherapy resistance in locally advanced rectal carcinoma
Source: Research Square preprint supplement (doi:10.21203/rs.3.rs-4870710/v1), 2024-10-08
Supplement: Supplementary file 1 [file 6f1374843aede5e2d699cb8a.xlsx]

## Sheet: Sheet1
		Table 1. Relashionship between S100A4 expression and clinicopathological factors
		in advanced colorectal carcinoma cases
				S100A4 IHC score
				High ( ≥ 1)	Low (<1)
			n	n (%)	n (%)	P-value
		Gender
		Male	78	53 (67.9)	25 (32.1)	0.2
		Female	72	43 (59.7)	29 (40.3)
		Age
		≤ 68 year	74	45 (60.8)	29 (39.2)	0.4
		≥ 69 year	76	51 (67.1)	25 (32.9)
		Tumor location
		Right colon	48	30 (62.5)	18 (37.5)	0.7
		Left colon	102	66 (64.7)	36 (35.3)
		Macroscopic findings
		Depression	135	89 (65.9)	46 (34.1)	0.1
		Elevation	15	7 (46.7)	8 (53.3)
		Histology
		tub	134	85 (63.4)	49 (36.6)	0.6
		muc,por,sig	16	11 (68.8)	5 (31.2)
		Tumor size
		≤ 4.2 cm	84	51 (60.7)	33 (39.3)	0.3
		≥ 4.3 cm	66	45 (68.2)	21 (31.8)
		Depth
		mp	39	19 (48.7)	20 (51.3)	0.02
		ss/se	111	77 (69.4)	34 (30.6)
		Tumor budding
		BD1	82	43 (52.4)	39 (47.6)	0.001
		BD2/3	68	53 (77.9)	15 (22.1)
		Ly invasion
		Positive	85	61 (71.8)	24 (28.2)	0.02
		Negative	65	35 (53.8)	30 (46.2)
		V invasion
		Positive	122	83 (68.0)	39 (32.0)	0.03
		Negative	28	13 (46.4)	15 (53.6)
		LN metastasis
		Positive	62	41 (66.1)	21 (33.9)	0.6
		Negative	88	55 (62.5)	33 (37.5)
		Distant metastasis
		Positive	16	13 (81.3)	3 (18.7)	0.1
		Negative	134	83 (61.9)	51 (38.1)
		Pathological stage
		Ⅰ/Ⅱ	83	50 (60.2)	33 (39.8)	0.2
		Ⅲ/Ⅳ	67	46 (68.7)	21 (31.3)
		tub, tubular; muc, mucinous; por, poorly; sig, signet; mp, muscularis propria; ss, subserosal
		se, serosal exposur, Ly, lymph vessel; V, venous vessel
		Pathological stage refers to the criteria of the Japanese Classification of Colorectal, Appendiceal,
		and Anal carcinoma
