# Supplementary material for: S100A4 contributes to colorectal carcinoma aggressive behavior and to chemoradiotherapy resistance in locally advanced rectal carcinoma
Source: Research Square preprint supplement (doi:10.21203/rs.3.rs-4870710/v1), 2024-10-08
Supplement: Supplementary file 2 [file d3746f13a449e958b1ad4622.xlsx]

## Sheet: Sheet1
	Table 2. Univariate and multivariate analyses for overall survival and progression-free survival in advanced colorectal carcinoma
		Univariate analysis					Multivariate analysis
	Variables	Cut-off	Logrank c2	P-value	unfavorable factor		Hazard Ratio	95% CI	P-value
	Overall survival
	Gender	male/female	0.11	0.7
	Age	68/69	7.31	0.006	> 69		2.169	1.12 - 4.21	0.02
	Location	R/L	1.11	0.2
	Macroscopic type	depression/uplift	1.77	0.1
	Histology	tub/others	1.43	0.2
	Tumor size	4.2/4.3	1.99	0.1
	Depth	mp/ss,se	10.29	0.001	SS,SE		0.357	0.12 - 1.05	0.06
	Lymphatic invasion	(-)/(+)	1.33	0.2
	Venous invasion	(-)/(+)	1.16	0.2
	LN metastasis	(-)/(+)	7.67	0.005	+		0.725	0.17 - 3.07	0.6
	Distant metastasis	(-)/(+)	30.02	< 0.0001	+		0.25	0.11 - 0.61	0.002
	Pathological stage	Ⅰ,Ⅱ/Ⅲ,Ⅳ	12.47	0.0004	Ⅲ,Ⅳ		1.1	0.21 - 5.82	0.9
	BD score	1/2,3	15.26	< 0.0001	2,3		2.36	1.18 - 4.72	0.01
	S100A4 expression	Low/High	3.92	0.04	High		1.345	0.63 - 2.82	0.4
	Progression-free survival
	Gender	male/female	0.21	0.6
	Age	68/69	3.37	0.06
	Location	R/L	0.02	0.8
	Macroscopic type	depression/uplift	-	-
	Histology	tub/others	0.26	0.6
	Tumor size	4.2/4.3	0.08	0.7
	Depth	mp/ss,se	8.81	0.003	SS,SE		0.355	0.11 - 1.22	0.1
	Lymphatic invasion	(-)/(+)	0.51	0.4
	Venous invasion	(-)/(+)	6.09	0.01	+		0.196	0.02 - 1.46	0.1
	LN metastasis	(-)/(+)	10.52	0.001	+		0.539	0.05 - 5.01	0.5
	Distant metastasis	(-)/(+)	4.82	0.02	+		0.709	0.24 - 2.03	0.5
	Pathological stage	Ⅰ,Ⅱ/Ⅲ,Ⅳ	11.59	0.0007	Ⅲ,Ⅳ		0.94	0.08 - 10.23	0.9
	BD score	1/2,3	5.33	0.02	2,3		1.615	0.78 - 3.33	0.1
	S100A4 expression	Low/High	1.05	0.3
	LN, lymph node; BD, tumor budding; mp, muscularis propria; ss, subserosal, se, serosa exposure; (-), negative; (+), positive
	Macroscopic type and pathological stage refer to the criteria of the Japanese Classification of Colorectal, Appendiceal, and Anal carcinoma
	Pathological stage refers to the criteria of the Japanese Classification of Colorectal, Appendiceal, and Anal carcinoma
