# Supplementary material for: S100A4 contributes to colorectal carcinoma aggressive behavior and to chemoradiotherapy resistance in locally advanced rectal carcinoma
Source: Research Square preprint supplement (doi:10.21203/rs.3.rs-4870710/v1), 2024-10-08
Supplement: Supplementary file 3 [file f0880707ed808368c10ede97.xlsx]

## Sheet: NCRT 単変量解析
	Table 3. Univariate and multivariate analyses for overall survival and progression-free survival in NCRT-treated locally advanced colorectal carcinoma
		Univariate analysis					Multivariate analysis
	Variables	Cut-off	Logrank c2	P-value	unfavorable factor		Hazard Ratio	95% CI	P-value
	Overall survival
	Gender	male/female	4.95	0.02	male		0.41	0.13 - 1.21	0.1
	Age	63/64	0.96	0.3
	Macroscopic type	type1-4/type5	0.57	0.4
	Histology type	tub/others	1.89	0.1
	Tumor size	3.1/3.2	15.95	< 0.0001	> 3.2		2.53	0.96 - 6.65	0.05
	Depth	mp/ss,se	6.11	0.01	SS,SE		0.72	0.19 - 2.68	0.6
	Lymphatic invasion	(-)/(+)	5.32	0.02	+		0.69	0.31 - 1.59	0.3
	Venousin invasion	(-)/(+)	4.21	0.04	+		0.56	0.21 - 1.48	0.2
	LN metastasis	(-)/(+)	19.95	< 0.0001	+		0.35	0.14 -0.85	0.02
	Distant metastasis	(-)/(+)	16.23	< 0.0001	+		0.38	0.16 - 0.86	0.02
	Treatment Effect	Grade 1/Grade 2	3.22	0.07
	S100A4 expression	Low/High	0.55	0.4
	Progression-free survival
	Gender	male/female	1.03	0.3
	Age	63/64	1.61	0.2
	Macroscopic type	type1-4/5	4.31	0.03	type1-4		0.91	0.52 - 1.55	0.7
	Histology type	tub/others	7.41	0.006	others		0.61	0.26 - 1.43	0.2
	Tumor size	3.1/3.2	14.21	0.0002	> 3.2		1.65	0.89 - 3.08	0.9
	Depth	mp/ss,se	8.51	0.003	SS,SE		0.82	0.31 - 2.18	0.6
	Lymphatic invasion	(-)/(+)	5.56	0.01	+		0.96	0.54 - 1.69	0.9
	Venous invasion	(-)/(+)	1.58	0.2
	LN metastasis	(-)/(+)	20.86	< 0.0001	+		0.49	0.26 - 0.89	0.01
	Distant metastasis	(-)/(+)	5.28	0.02	+		0.67	0.33 - 1.37	0.2
	Pathological stage	Ⅰ/Ⅱ,Ⅲ,Ⅳ	11.55	0.0007	Ⅱ,Ⅲ,Ⅳ		2.21	0.64 - 7.59	0.2
	Clinical stage	Ⅰ,Ⅱ/Ⅲ,Ⅳ	5.65	0.01	Ⅲ,Ⅳ		0.99	0.57 - 1.86	0.9
	Treatment Effect	Grade 1/Grade 2	3.61	0.05
	S100A4 expression	Low/High	4.25	0.03	High		1.53	0.91 - 2.57	0.1
	NCRT, neoajuvant chemoradiotherapy; LN, lymph node; BD, tumor budding; mp, muscularis propria; ss, subserosal, se, serosa exposure; (-), negative; (+), positive
	Pathological stage refers to the criteria of the Japanese Classification of Colorectal, Appendiceal, and Anal carcinoma
